# Supplementary material for: Impact of receiving recorded mental health recovery narratives on quality of life in people experiencing psychosis, people experiencing other mental health problems and for informal carers: Narrative Experiences Online (NEON) study protocol for three randomised controlled trials
Source: PubMed Central journal article supplement (PMC7370499; doi:10.1186/s13063-020-04428-6), 2020-07-20
Supplement: 13063_2020_4428_MOESM5_ESM.pdf [file 13063_2020_4428_MOESM5_ESM.pdf]

Have you experienced something like psychosis?

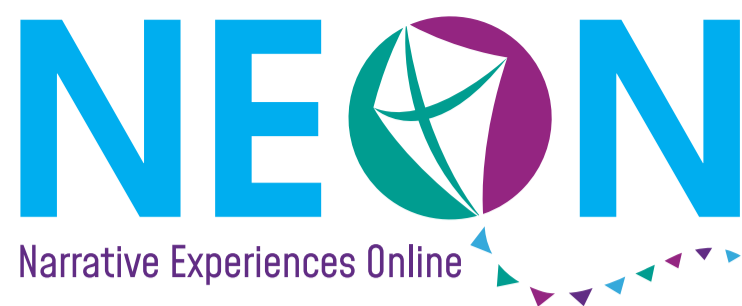

COULD REAL-LIFE RECOVERY STORIES HELP YOU?

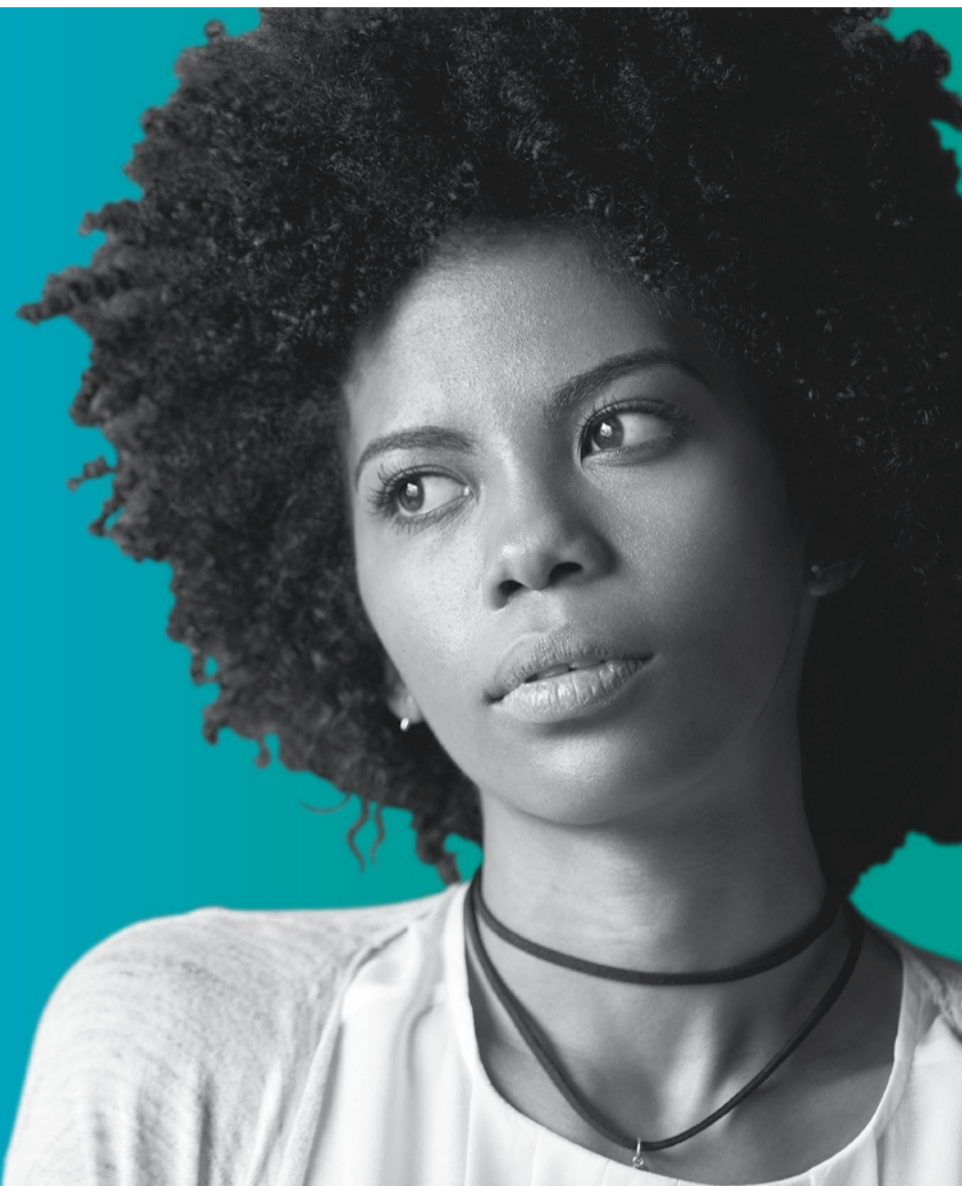

Join the

NEON

Trial

Find out more at [recoverystories.uk](http://recoverystories.uk)

NEON is funded by the NIHR (RP-PG-0615-20016). This study has been given favourable opinion by Leicester Central REC, and has been approved by the HRA. The study sponsor is Nottinghamshire Healthcare NHS Foundation Trust. File: NEON Trial. Poster EW. v2 20.12.19.

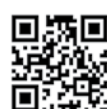

  
**Nottinghamshire Healthcare**  
NHS Foundation Trust
