# Supplementary material for: Impact of receiving recorded mental health recovery narratives on quality of life in people experiencing psychosis, people experiencing other mental health problems and for informal carers: Narrative Experiences Online (NEON) study protocol for three randomised controlled trials
Source: PubMed Central journal article supplement (PMC7370499; doi:10.1186/s13063-020-04428-6), 2020-07-20
Supplement: 13063_2020_4428_MOESM7_ESM.pdf [file 13063_2020_4428_MOESM7_ESM.pdf]

Do you care for  
someone with mental  
health problems?

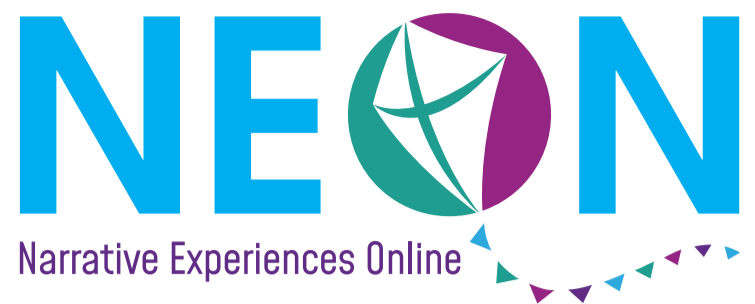

**COULD REAL-LIFE  
RECOVERY STORIES  
HELP YOU?**

Join the

**NEON-C**

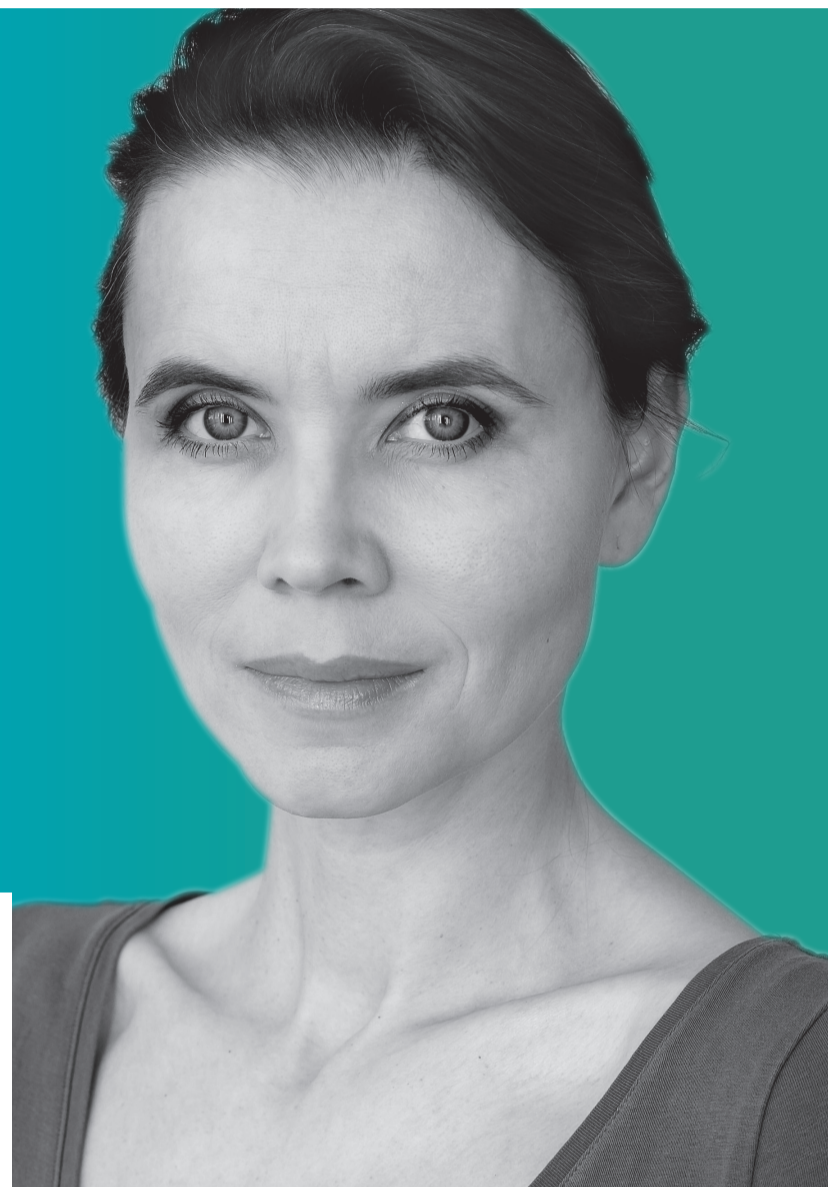

**Trial**

Find out more at  
**recoverystories.uk**

NEON is funded by the NIHR (RP-PG-0615-20016).  
This study has been given favourable opinion by Leicester  
Central REC, and has been approved by the HRA. The study  
sponsor is Nottinghamshire Healthcare NHS Foundation Trust.  
File: NEON-C Trial. Poster MWW. v2 20.12.19.

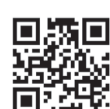

**NHS**  
**Nottinghamshire Healthcare**  
NHS Foundation Trust
