# Supplementary material for: Impact of receiving recorded mental health recovery narratives on quality of life in people experiencing psychosis, people experiencing other mental health problems and for informal carers: Narrative Experiences Online (NEON) study protocol for three randomised controlled trials
Source: PubMed Central journal article supplement (PMC7370499; doi:10.1186/s13063-020-04428-6), 2020-07-20
Supplement: 13063_2020_4428_MOESM10_ESM.pdf [file 13063_2020_4428_MOESM10_ESM.pdf]

**Informed Consent Form - <insert trial name>**  
Version 3.0. 13<sup>th</sup> December 2019.

If you have any questions about this form, you can contact the research team through [neon@nottingham.ac.uk](mailto:neon@nottingham.ac.uk) or can leave a voice message or send a text to 07973 841271.

To provide your consent to take part in the NEON study, **please select “Yes”** against questions 1-7.

*[Note to REC: Each of the boxes presents a drop-down menu which defaults to the value “No”, and potential participants must change this to “Yes”]*

- |                                                                                                                                                                                                                  |                                |
|------------------------------------------------------------------------------------------------------------------------------------------------------------------------------------------------------------------|--------------------------------|
| 1. I have read and understand the online participant information sheet (PIS) dated version 3.0. 13 <sup>th</sup> December 2019.                                                                                  | <input type="text" value="1"/> |
| 2. I understand that my participation is voluntary, and that I can withdraw at any time without giving any reason, without my care or legal rights being affected.                                               | <input type="text" value="2"/> |
| 3. I understand that my data will be held by DRT Software, Nottingham University and Nottinghamshire Healthcare NHS Foundation Trust                                                                             | <input type="text" value="3"/> |
| 4. I understand that any contact details that I provide can only be used to contact me about the study, and for no other reason                                                                                  | <input type="text" value="4"/> |
| 5. I understand that my data will be accessed by the study team, and may be audited by Nottinghamshire Healthcare NHS Foundation Trust and the Pragmatic Clinical Trials Unit at Queen Mary University of London | <input type="text" value="5"/> |
| 6. I consent to the use of an anonymised version of information collected about me in this and other research studies.                                                                                           | <input type="text" value="6"/> |
| 7. I agree to take part in this research study                                                                                                                                                                   | <input type="text" value="8"/> |
| 8. OPTIONAL: I would like to take part in an interview about the trial (by telephone or video-conference). I understand this is optional and does not affect my trial participation.                             | <input type="text" value="7"/> |

To create a login for you, we need an email address. Please enter this below, and we'll send an email with a link to click, to check it is working.

We don't need to know your name for this study. If you don't want us to know your name, you could use an email address which doesn't include your name.

.....

We can also use text messages to contact you about the study. If you would like to provide a mobile number, please enter it below.

.....

<Provide two buttons: “I agree to take part in the study” or “I do not wish to take part”>
